# Supplementary material for: A new class of electrolytes based on magnesium bis(diisopropyl)amide for magnesium–sulfur batteries
Source: Royal Society of Chemistry journal article supplement (doi:10.1039/c9cc02556a), 2019-01-01
Supplement: c9cc02556a1.pdf [file c9cc02556a1.pdf]

# A new class of electrolytes based on magnesium bis(diisopropyl)amide for magnesium-sulfur batteries

Xinghe Zhao, Yuanying Yang, Yanna NuLi,\* Dongyu Li, Yurui Wang, Xuelin Xiang

## Supporting Information

### Preparation of electrolyte and sulfur@microporous composite

The preparation of electrolytes was conducted in an argon-filled glove box (Mbraun, Unilab, Germany) with H<sub>2</sub>O and O<sub>2</sub> below 2 ppm. 0.25 mol L<sup>-1</sup> MBA-AlCl<sub>3</sub>/THF electrolytes with molar ratios of 2:1, 1:1 and 1:2 for MBA to AlCl<sub>3</sub> were prepared by dissolving the predetermined amount of magnesium bis(diisopropyl)amide (MBA, 0.7 mol L<sup>-1</sup> solution in THF, Sigma-Aldrich, >99.5%) and AlCl<sub>3</sub> (Sigma-Aldrich, 99.99%) in tetrahydrofuran (THF) (Aladdin, further dried using a 3 Å molecular sieve) or THF and 1,3-dioxolane (DOL) (Aladdin, further dried using a 3 Å molecular sieve), THF and dimethoxyethane (DME) (Aladdin, further dried using a 3 Å molecular sieve), THF and tetraglyme (TG) (Aladdin, further dried using a 3 Å molecular sieve) mixed solvents (1:1 volume ratio) under stirring at room temperature for at least 4h. 0.4 mol L<sup>-1</sup> (PhMgCl)<sub>2</sub>+AlCl<sub>3</sub>/THF electrolyte was obtained by dissolving the predetermined amount of PhMgCl (Sigma-Aldrich, 95%) and AlCl<sub>3</sub> in THF under stirring for at least 24h.

Sulfur@microporous carbon (S@MC) composite with 55.8 wt% sulfur content was prepared by a melt-diffusion method. Sublimed sulfur (S, 99.99%, Sigma-Aldrich) and commercial microporous carbon (MC, ACS Material LLC, USA) at a weight ratio of 4:1 were mixed by ball-milling at 350 rpm for 1h. Subsequently, the mixture was heated at 155 °C for 25h with a heating rate of 0.5 °C min<sup>-1</sup>, then at 300 °C for 3h with a heating rate of 5°C min<sup>-1</sup> in a tubular furnace under argon atmosphere, causing the molten sulfur to flow into the pores of the MC to achieve the S@MC composite.

### Material Characterization

The ionic conductivity of the solutions was measured using a DDB-303A conductivity meter (INESA INSTRUMENT). X-ray diffraction (XRD) analysis of the magnesium deposits was conducted on a Rigaku diffractometer D/MAX-2200/PC equipped with Cu K $\alpha$  radiation. The morphology of the deposits was observed using scanning electron microscopy (SEM) on a FEI SIRION200 field-emission microscope. Before the analysis of the deposits, the sample deposited for 50 hour at 0.088 mA cm<sup>-2</sup> was washed in the argon-filled glove box with drying THF solvent to remove soluble residue and then transferred out of the box and kept without exposure to the atmosphere.

S@MC composite was characterized by XRD, thermogravimetric analysis (TGA) using a Thermo Gravimetric Analyzer (TGA/Pyris 1 TGA), X-ray Photoelectron Spectroscopy (XPS) analysis performed on an AXIS UltraDLD, SEM using a JEOL field-emission microscope (JSM-7401F) and transmission electron microscopy (TEM) performed on a JEOL high-resolution electron microscope (JEM-2010). After discharging to 0.5V, the cathodes were washed with drying THF solvent to remove soluble residue in the argon-filled glove box and then transferred out of the glove box without exposure to the atmosphere.

### Electrochemical Measurements

Cyclic voltammograms (CVs) were conducted in three-electrode cells inside an argon-filled glove box using an electrochemical instrument of CHI604A Electrochemical Workstation (Shanghai, China). The working

electrode was a stainless steel, aluminum, copper and platinum disk (geometric area =  $3.14 \times 10^{-2} \text{ cm}^2$ ), which was polished with a corundum suspension and rinsed with dry acetone before use, and magnesium ribbon as counter and reference electrodes. Electrochemical magnesium plating/stripping cycles were examined with CR2016 experimental coin cells on a land battery measurement system (Wuhan, China). Stainless steel foil ( $\Phi 12 \text{ mm}$ ) was served as the working electrode (substrate). Mg ribbon as the counter electrode. An Entek PE and a fiber membrane as the separator. The cells were assembled in the argon-filled glove box. Magnesium was plated onto the stainless steel substrate for fixed periods of 30 min followed by stripping to a fixed potential limit of 0.8 V vs. Mg at a constant current density of  $0.088 \text{ mA cm}^{-2}$ . There was a 30 second rest between plating and stripping. The magnesium plating and stripping on the substrate were referred to as the discharge and charge process, respectively. The time of charge divided by the time of discharge was defined as the plating/stripping efficiency.

The S@MC electrode was prepared by casting and pressing an 8:1:1 weight-ratio mixture of S@MC, super-P carbon powder (timcal) and polyvinylidene fluoride (PVDF) binder dissolved in N-methyl-2-pyrrolidinone (NMP) onto copper current collector followed by drying in vacuum at  $50 \text{ }^\circ\text{C}$ . CR2016 coin cells were fabricated with S@MC cathode, Mg anode, Entek PE and fiber membrane separator, and  $0.25 \text{ mol L}^{-1} \text{ MBA} + 2\text{AlCl}_3/\text{THF}$  or  $0.4 \text{ mol L}^{-1} (\text{PhMgCl})_2 + \text{AlCl}_3/\text{THF}$  electrolyte. LiCl (Alfa Aesar, ultra dry, 99.9%) with different concentrations was further added in the electrolytes to improve the electrochemical performance of the Mg-S batteries. The discharge-charge tests of the coin cells were carried out on a land battery measurement system (Wuhan, China) with the cutoff voltage of 0.5/1.7 V vs. Mg.

**Table S1.** Crystal data and structure refinement for  $[\text{Mg}_2(\mu\text{-Cl})_2(\text{THF})_6](\text{AlCl}_4)_2$ 

|                                             |                                                                            |
|---------------------------------------------|----------------------------------------------------------------------------|
| Empirical formula                           | $\text{C}_{24}\text{H}_{48}\text{O}_6\text{Mg}_2\text{Al}_2\text{Cl}_{10}$ |
| Formula weight                              | 889.74                                                                     |
| Temperature/K                               | 173                                                                        |
| Crystal system                              | monoclinic                                                                 |
| a/Å                                         | 10.814                                                                     |
| b/Å                                         | 12.9032                                                                    |
| c/Å                                         | 13.3989                                                                    |
| $\alpha^\circ$                              | 63.042                                                                     |
| $\beta^\circ$                               | 90                                                                         |
| $\gamma^\circ$                              | 90                                                                         |
| Volume/Å <sup>3</sup>                       | 1666.46                                                                    |
| Z                                           | 33                                                                         |
| $\rho_{\text{calc}} \text{ mg/mm}^3$        | 1.552                                                                      |
| $\mu/\text{mm}^{-1}$                        | 0.766                                                                      |
| F(000)                                      | 768.0                                                                      |
| Crystal size/ $\text{mm}^3$                 | $0.12 \times 0.13 \times 0.13$                                             |
| 2 $\theta$ range for data collection        | 3.70 to 68.53°                                                             |
| Index ranges                                | $-12 \leq h \leq 12, -14 \leq k \leq 14, -14 \leq l \leq 14$               |
| Reflections collected                       | 22891                                                                      |
| Independent reflections                     | 4566[R(int) = 0.0452, R(sigma) = 0.0389]                                   |
| Data/restraints/parameters                  | 4566/0/334                                                                 |
| Goodness-of-fit on F <sup>2</sup>           | 2.615                                                                      |
| Final R indexes [ $I \geq 2\sigma(I)$ ]     | R1 = 0.1521, wR2 = 0.5012                                                  |
| Final R indexes [all data]                  | R1 = 0.1549, wR2 = 0.5012                                                  |
| Largest diff. peak/hole / e Å <sup>-3</sup> | 0.04/-0.77                                                                 |

**Table S2.** Fractional Atomic Coordinates ( $\times 104$ ) and Equivalent Isotropic Displacement Parameters (Å<sup>2</sup> $\times 103$ ) for  $[\text{Mg}_2(\mu\text{-Cl})_2(\text{THF})_6](\text{AlCl}_4)_2$ . U<sub>eq</sub> is defined as 1/3 of the trace of the orthogonalised Uij tensor.

| Atom | x      | y      | z       | U(eq)  |
|------|--------|--------|---------|--------|
| Al1  | 0.7511 | 0.3971 | 0.82684 | 0.0532 |
| C0AA | 1.0906 | 0.2764 | 0.194   | 0.069  |
| C1   | 0.6885 | 0.4696 | 0.1866  | 0.06   |
| C11  | 1.0573 | 0.1521 | 0.2133  | 0.063  |
| C12  | 0.9623 | 0.1158 | 0.3034  | 0.057  |
| C13  | 0.8416 | 0.2276 | 0.6136  | 0.082  |
| C14  | 0.9587 | 0.208  | 0.6818  | 0.098  |
| C15  | 1.0542 | 0.2523 | 0.5994  | 0.094  |
| C16  | 1.0092 | 0.234  | 0.5022  | 0.065  |
| C17  | 0.5273 | 0.1541 | 0.569   | 0.06   |
| C18  | 0.4076 | 0.2125 | 0.5766  | 0.065  |
| C19  | 0.4519 | 0.3323 | 0.558   | 0.069  |
| C2   | 0.7279 | 0.5925 | 0.1352  | 0.072  |
| C20  | 0.5493 | 0.3576 | 0.4698  | 0.068  |

|      |         |         |         |        |
|------|---------|---------|---------|--------|
| C21  | 0.1763  | -0.0007 | 0.9126  | 0.065  |
| C22  | 0.1582  | 0.0307  | 1.0056  | 0.074  |
| C23  | 0.2833  | 0.074   | 1.022   | 0.079  |
| C24  | 0.3516  | 0.0908  | 0.9143  | 0.086  |
| C3   | 0.757   | 0.6112  | 0.238   | 0.069  |
| C4   | 0.8142  | 0.4974  | 0.3172  | 0.0537 |
| C5   | 0.6578  | 0.1668  | 0.2043  | 0.07   |
| C6   | 0.5399  | 0.1512  | 0.1551  | 0.095  |
| C7   | 0.4438  | 0.2089  | 0.1865  | 0.093  |
| C8   | 0.4907  | 0.2103  | 0.2901  | 0.063  |
| C9   | 0.9666  | 0.3204  | 0.2103  | 0.062  |
| C11  | 0.7881  | 0.5171  | 0.6571  | 0.1011 |
| C12  | 0.6483  | 0.2537  | 0.8299  | 0.0766 |
| C13  | 0.6497  | 0.478   | 0.9079  | 0.1011 |
| C14  | 0.9228  | 0.3352  | 0.913   | 0.0753 |
| C15  | 0.75179 | 0.00618 | 0.51333 | 0.02   |
| H0AA | 1.1519  | 0.2751  | 0.2493  | 0.082  |
| H0AB | 1.1229  | 0.324   | 0.1174  | 0.082  |
| H11A | 1.023   | 0.1525  | 0.1446  | 0.076  |
| H11B | 1.1303  | 0.1002  | 0.2381  | 0.076  |
| H12A | 0.9007  | 0.0638  | 0.2946  | 0.068  |
| H12B | 1.0016  | 0.074   | 0.3779  | 0.068  |
| H13A | 0.7885  | 0.1575  | 0.6472  | 0.098  |
| H13B | 0.7947  | 0.294   | 0.6126  | 0.098  |
| H14A | 0.9559  | 0.2509  | 0.7272  | 0.117  |
| H14B | 0.9713  | 0.1243  | 0.7322  | 0.117  |
| H15A | 1.1325  | 0.2098  | 0.6293  | 0.113  |
| H15B | 1.0682  | 0.336   | 0.576   | 0.113  |
| H16A | 1.0462  | 0.2914  | 0.4309  | 0.078  |
| H16B | 1.0288  | 0.1546  | 0.5131  | 0.078  |
| H17A | 0.5713  | 0.1193  | 0.6416  | 0.073  |
| H17B | 0.511   | 0.0929  | 0.5454  | 0.073  |
| H18A | 0.3684  | 0.1694  | 0.6511  | 0.078  |
| H18B | 0.3481  | 0.2186  | 0.518   | 0.078  |
| H19A | 0.3842  | 0.3903  | 0.5306  | 0.083  |
| H19B | 0.4873  | 0.3298  | 0.6272  | 0.083  |
| H1A  | 0.5977  | 0.464   | 0.1969  | 0.073  |
| H1B  | 0.7118  | 0.4335  | 0.138   | 0.073  |
| H20A | 0.5125  | 0.4002  | 0.3942  | 0.081  |
| H20B | 0.6157  | 0.4061  | 0.4778  | 0.081  |
| H21  | 0.1349  | -0.0599 | 0.902   | 0.079  |
| H22A | 0.1318  | -0.038  | 1.0748  | 0.089  |
| H22B | 0.0948  | 0.0923  | 0.9856  | 0.089  |
| H23A | 0.3253  | 0.0158  | 1.0901  | 0.095  |

|      |         |         |         |        |
|------|---------|---------|---------|--------|
| H23B | 0.2759  | 0.1482  | 1.0266  | 0.095  |
| H24  | 0.4369  | 0.1084  | 0.899   | 0.103  |
| H2A  | 0.6608  | 0.6448  | 0.0897  | 0.086  |
| H2B  | 0.802   | 0.6053  | 0.0877  | 0.086  |
| H3A  | 0.8156  | 0.6764  | 0.2191  | 0.082  |
| H3B  | 0.6808  | 0.6267  | 0.27    | 0.082  |
| H4A  | 0.904   | 0.4974  | 0.3029  | 0.064  |
| H4B  | 0.8017  | 0.4823  | 0.3958  | 0.064  |
| H5A  | 0.72    | 0.075   | 0.285   | 0.084  |
| H5B  | 0.746   | 0.208   | 0.173   | 0.025  |
| H6A  | 0.5468  | 0.186   | 0.0725  | 0.114  |
| H6B  | 0.5206  | 0.0675  | 0.1843  | 0.114  |
| H7A  | 0.3649  | 0.1655  | 0.2011  | 0.112  |
| H7B  | 0.4304  | 0.289   | 0.1267  | 0.112  |
| H8A  | 0.4434  | 0.2083  | 0.3507  | 0.075  |
| H8B  | 0.463   | 0.286   | 0.29    | 0.019  |
| H9A  | 0.9779  | 0.3807  | 0.2359  | 0.075  |
| H9B  | 0.9198  | 0.3548  | 0.1391  | 0.075  |
| Mg1  | 0.75092 | 0.22479 | 0.39502 | 0.0389 |
| O1   | 0.7508  | 0.4103  | 0.295   | 0.0493 |
| O2   | 0.6234  | 0.2153  | 0.279   | 0.0452 |
| O3   | 0.9021  | 0.2239  | 0.2921  | 0.0439 |
| O4   | 0.8748  | 0.251   | 0.5038  | 0.0474 |
| O5   | 0.5981  | 0.2499  | 0.484   | 0.0476 |
| O6   | 0.2675  | 0.0756  | 0.8441  | 0.0795 |

**Table S3.** Fractional Atomic Coordinates ( $\times 104$ ) and Equivalent Isotropic Displacement Parameters ( $\text{\AA}^2 \times 103$ ) for  $[\text{Mg}_2(\mu\text{-Cl})_2(\text{THF})_6](\text{AlCl}_4)_2$ . Ueq is defined as 1/3 of the trace of the orthogonalised UIJ tensor.

| Atom | U11         | U22         | U33         | U12           | U13          | U23           |
|------|-------------|-------------|-------------|---------------|--------------|---------------|
| Al1  | 0.000547134 | 0.000833367 | 0.000606661 | -0.0000355    | -0.0000418   | -0.000295098  |
| C0AA | 0.000671253 | 0.00119052  | 0.000987882 | -0.000113986  | -0.00113986  | -0.000709248  |
| C1   | 0.000683918 | 0.000772574 | 0.000772574 | -0.0000126651 | -0.000126651 | -0.000291298  |
| C11  | 0.000645923 | 0.00115253  | 0.000658588 | 0.000088656   | 0.00088656   | -0.000455945  |
| C12  | 0.000531936 | 0.0008359   | 0.00086123  | 0.000164647   | 0.00164647   | -0.00044328   |
| C13  | 0.000671253 | 0.00181112  | 0.000759909 | 0.0000506606  | 0.000506606  | -0.000696583  |
| C14  | 0.000899226 | 0.00210241  | 0.000911891 | 0.000215308   | 0.00215308   | -0.00086123   |
| C15  | 0.000671253 | 0.00220374  | 0.000911891 | -0.000113986  | -0.00113986  | -0.000899226  |
| C16  | 0.000506606 | 0.00132984  | 0.000671253 | 0.0000253303  | 0.000253303  | -0.000506606  |
| C17  | 0.000645923 | 0.000899226 | 0.000747244 | 0             | 0            | -0.0000367289 |
| C18  | 0.000633257 | 0.000962551 | 0.000848565 | 0.0000633257  | 0.000633257  | -0.000354624  |
| C19  | 0.000734579 | 0.00116519  | 0.000899226 | 0.000189977   | 0.00189977   | -0.000620592  |
| C2   | 0.000873895 | 0.000949886 | 0.000759909 | 0.000164647   | 0.00164647   | -0.000253303  |
| C20  | 0.000759909 | 0.000899226 | 0.00107654  | 0.000088656   | 0.00088656   | -0.000582597  |
| C21  | 0.000582597 | 0.00111453  | 0.000772574 | -0.000113986  | -0.00113986  | -0.00041795   |

|      |             |             |             |               |              |              |
|------|-------------|-------------|-------------|---------------|--------------|--------------|
| C22  | 0.000683918 | 0.00121585  | 0.00115253  | -0.000088656  | -0.00088656  | -0.000721913 |
| C23  | 0.000797904 | 0.000962551 | 0.00124118  | -0.000151982  | -0.00151982  | -0.000493941 |
| C24  | 0.000747244 | 0.00100055  | 0.00157048  | -0.000177312  | -0.00177312  | -0.000620592 |
| C3   | 0.000848565 | 0.0008359   | 0.00105121  | -0.0000633257 | -0.000633257 | -0.000531936 |
| C4   | 0.000607927 | 0.000759909 | 0.000721913 | -0.000126651  | -0.00126651  | -0.000379954 |
| C5   | 0.000671253 | 0.00129185  | 0.000987882 | 0.0000379954  | 0.000379954  | -0.000772574 |
| C6   | 0.000911891 | 0.00197576  | 0.00115253  | -0.000088656  | -0.00088656  | -0.00107654  |
| C7   | 0.000734579 | 0.00203909  | 0.00130451  | 0.0000759909  | 0.000759909  | -0.00122852  |
| C8   | 0.000582597 | 0.00116519  | 0.0008359   | -0.000101321  | -0.00101321  | -0.000633257 |
| C9   | 0.000671253 | 0.000911891 | 0.000899226 | 0.0000253303  | 0.000253303  | -0.000493941 |
| C11  | 0.00148182  | 0.00118292  | 0.000683918 | -0.000371089  | -0.00371089  | 0.00000633   |
| C12  | 0.000928355 | 0.0011348   | 0.000882761 | -0.000401485  | -0.00401485  | -0.000487608 |
| C13  | 0.000976483 | 0.00169713  | 0.00157048  | 0.000340692   | 0.00340692   | -0.00110187  |
| C14  | 0.000661121 | 0.00123738  | 0.000827034 | 0.000044328   | 0.00044328   | -0.000347025 |
| C15  | 0.000149449 | 0.000234305 | 0.000311563 | 0.0000240638  | 0.000240638  | -6.71E-05    |
| H0AA | 0.0126651   | 0.0126651   | 0.0126651   | 0.0126651     | 0.126651     | 0.0126651    |
| H0AB | 0.0126651   | 0.0126651   | 0.0126651   | 0.0126651     | 0.126651     | 0.0126651    |
| H11A | 0.0126651   | 0.0126651   | 0.0126651   | 0.0126651     | 0.126651     | 0.0126651    |
| H11B | 0.0126651   | 0.0126651   | 0.0126651   | 0.0126651     | 0.126651     | 0.0126651    |
| H12A | 0.0126651   | 0.0126651   | 0.0126651   | 0.0126651     | 0.126651     | 0.0126651    |
| H12B | 0.0126651   | 0.0126651   | 0.0126651   | 0.0126651     | 0.126651     | 0.0126651    |
| H13A | 0.0126651   | 0.0126651   | 0.0126651   | 0.0126651     | 0.126651     | 0.0126651    |
| H13B | 0.0126651   | 0.0126651   | 0.0126651   | 0.0126651     | 0.126651     | 0.0126651    |
| H14A | 0.0126651   | 0.0126651   | 0.0126651   | 0.0126651     | 0.126651     | 0.0126651    |
| H14B | 0.0126651   | 0.0126651   | 0.0126651   | 0.0126651     | 0.126651     | 0.0126651    |
| H15A | 0.0126651   | 0.0126651   | 0.0126651   | 0.0126651     | 0.126651     | 0.0126651    |
| H15B | 0.0126651   | 0.0126651   | 0.0126651   | 0.0126651     | 0.126651     | 0.0126651    |
| H16A | 0.0126651   | 0.0126651   | 0.0126651   | 0.126651      | 0.126651     | 0.0126651    |
| H16B | 0.0126651   | 0.0126651   | 0.0126651   | 0.126651      | 0.126651     | 0.0126651    |
| H17A | 0.0126651   | 0.0126651   | 0.0126651   | 0.126651      | 0.126651     | 0.0126651    |
| H17B | 0.0126651   | 0.0126651   | 0.0126651   | 0.126651      | 0.126651     | 0.0126651    |
| H18A | 0.0126651   | 0.0126651   | 0.0126651   | 0.126651      | 0.126651     | 0.0126651    |
| H18B | 0.0126651   | 0.0126651   | 0.0126651   | 0.126651      | 0.126651     | 0.0126651    |
| H19A | 0.0126651   | 0.0126651   | 0.0126651   | 0.126651      | 0.126651     | 0.0126651    |
| H19B | 0.0126651   | 0.0126651   | 0.0126651   | 0.126651      | 0.126651     | 0.0126651    |
| H1A  | 0.0126651   | 0.0126651   | 0.0126651   | 0.126651      | 0.126651     | 0.0126651    |
| H1B  | 0.0126651   | 0.0126651   | 0.0126651   | 0.126651      | 0.126651     | 0.0126651    |
| H20A | 0.0126651   | 0.0126651   | 0.0126651   | 0.126651      | 0.126651     | 0.0126651    |
| H20B | 0.0126651   | 0.0126651   | 0.0126651   | 0.126651      | 0.126651     | 0.0126651    |
| H21  | 0.0126651   | 0.0126651   | 0.0126651   | 0.126651      | 0.126651     | 0.0126651    |
| H22A | 0.0126651   | 0.0126651   | 0.0126651   | 0.126651      | 0.126651     | 0.0126651    |
| H22B | 0.0126651   | 0.0126651   | 0.0126651   | 0.126651      | 0.126651     | 0.0126651    |
| H23A | 0.0126651   | 0.0126651   | 0.0126651   | 0.126651      | 0.126651     | 0.0126651    |
| H23B | 0.0126651   | 0.0126651   | 0.0126651   | 0.126651      | 0.126651     | 0.0126651    |

|     |             |             |             |              |              |              |
|-----|-------------|-------------|-------------|--------------|--------------|--------------|
| H24 | 0.0126651   | 0.0126651   | 0.0126651   | 0.126651     | 0.126651     | 0.0126651    |
| H2A | 0.0126651   | 0.0126651   | 0.0126651   | 0.126651     | 0.126651     | 0.0126651    |
| H2B | 0.0126651   | 0.0126651   | 0.0126651   | 0.126651     | 0.126651     | 0.0126651    |
| H3A | 0.0126651   | 0.0126651   | 0.0126651   | 0.126651     | 0.126651     | 0.0126651    |
| H3B | 0.0126651   | 0.0126651   | 0.0126651   | 0.126651     | 0.126651     | 0.0126651    |
| H4A | 0.0126651   | 0.0126651   | 0.0126651   | 0.126651     | 0.126651     | 0.0126651    |
| H4B | 0.0126651   | 0.0126651   | 0.0126651   | 0.126651     | 0.126651     | 0.0126651    |
| H5A | 0.0126651   | 0.0126651   | 0.0126651   | 0.126651     | 0.126651     | 0.0126651    |
| H5B | 0.0126651   | 0.0126651   | 0.0126651   | 0.126651     | 0.126651     | 0.0126651    |
| H6A | 0.0126651   | 0.0126651   | 0.0126651   | 0.126651     | 0.126651     | 0.0126651    |
| H6B | 0.0126651   | 0.0126651   | 0.0126651   | 0.126651     | 0.126651     | 0.0126651    |
| H7A | 0.0126651   | 0.0126651   | 0.0126651   | 0.126651     | 0.126651     | 0.0126651    |
| H7B | 0.0126651   | 0.0126651   | 0.0126651   | 0.126651     | 0.126651     | 0.0126651    |
| H8A | 0.0126651   | 0.0126651   | 0.0126651   | 0.126651     | 0.126651     | 0.0126651    |
| H8B | 0.0126651   | 0.0126651   | 0.0126651   | 0.126651     | 0.126651     | 0.0126651    |
| H9A | 0.0126651   | 0.0126651   | 0.0126651   | 0.126651     | 0.126651     | 0.0126651    |
| H9B | 0.0126651   | 0.0126651   | 0.0126651   | 0.126651     | 0.126651     | 0.0126651    |
| Mg1 | 0.000405285 | 0.000577531 | 0.000509139 | 0.000151982  | 0.000151982  | -0.000259636 |
| O1  | 0.000645923 | 0.000582597 | 0.000595262 | 0.000544601  | 0.000544601  | -0.000215308 |
| O2  | 0.000531936 | 0.000620592 | 0.000582597 | 0.000164647  | 0.000164647  | -0.000291298 |
| O3  | 0.00046861  | 0.000633257 | 0.000607927 | 0.000189977  | 0.000189977  | -0.000316629 |
| O4  | 0.000544601 | 0.000759909 | 0.000569932 | -0.000379954 | -0.000379954 | -0.000367289 |
| O5  | 0.000519271 | 0.000658588 | 0.000595262 | 0.000455945  | 0.000455945  | -0.000265968 |
| O6  | 0.000975216 | 0.0010892   | 0.000785239 | -0.000633257 | -0.000633257 | -0.000278633 |

**Table S4.** Comparison of cycling performance of Mg-S batteries reported in the literatures with this work.

| Cathode material | S content (wt%) | Electrolyte                                                                                                                   |      | Cycling performance                       |                              |                                                               | Ref.      |
|------------------|-----------------|-------------------------------------------------------------------------------------------------------------------------------|------|-------------------------------------------|------------------------------|---------------------------------------------------------------|-----------|
|                  |                 |                                                                                                                               |      | Current density (C, mA g <sup>-1</sup> s) | Discharge plateau (V vs. Mg) | Final discharge capacity (mAh g <sup>-1</sup> s)/cycle number |           |
| S/CMK-3          | 55              | 1.2 mol L <sup>-1</sup> (HMDS) <sub>2</sub> Mg+(AlCl <sub>3</sub> ) <sub>2</sub> +MgCl <sub>2</sub> /PP14TFSI+diglyme         | PVDF | 20 mA g <sup>-1</sup> (0.012 C)           | 1.65                         | about 150/20                                                  | 5         |
|                  |                 |                                                                                                                               | CMC  |                                           | 1.65                         | about 200/20                                                  |           |
|                  |                 | 1.2 mol L <sup>-1</sup> (HMDS) <sub>2</sub> Mg+(AlCl <sub>3</sub> ) <sub>2</sub> +MgCl <sub>2</sub> /PP14TFSI+tetraglyme      | PVDF |                                           | 1.6                          | about 250/20                                                  |           |
|                  |                 |                                                                                                                               | CMC  |                                           | 1.65                         | about 260/20                                                  |           |
| S/rGO            | 49              | 1.8 mol L <sup>-1</sup> (HMDS) <sub>2</sub> Mg+(AlCl <sub>3</sub> ) <sub>2</sub> +MgCl <sub>2</sub> /tetraglyme               |      | 20 mA g <sup>-1</sup> (0.012 C)           | 1.3~1.72<br>0.7-1.3          | 219/50                                                        | 6         |
| S/ACC            | 15              | 0.1 mol L <sup>-1</sup> (HMDS) <sub>2</sub> Mg+ (AlCl <sub>3</sub> ) <sub>2</sub> + 1.0 mol L <sup>-1</sup> LiTFSI/tetraglyme |      | 1 C                                       | 1.75<br>1.2                  | 1000/30                                                       | 17        |
| S/CNF            | 50              | 3.6 mol L <sup>-1</sup> (HMDS) <sub>2</sub> Mg+(AlCl <sub>3</sub> ) <sub>2</sub> +MgCl <sub>2</sub> /tetraglyme               |      | 0.02 C                                    | about 1.55<br>0.85           | about 750/20                                                  | 7         |
| S/C              | 85              | 0.5 mol L <sup>-1</sup> THFPB+0.05 mol L <sup>-1</sup> MgF <sub>2</sub> /DME                                                  |      | 50 mA g <sup>-1</sup> (0.03 C)            | 1.05                         | about 980/30                                                  | 9         |
| S/C              | /               | 0.5 mol L <sup>-1</sup> THFPB+0.05 mol L <sup>-1</sup> MgO/DME                                                                |      | 10 mA g <sup>-1</sup> (0.006 C)           | 1.1                          | 1030/15                                                       | 10        |
| S/CMK-3          | 55              | 0.4 mol L <sup>-1</sup> Mg[B(hfp) <sub>4</sub> ] <sub>2</sub> /DME                                                            |      | 0.1 C                                     | 1.25~1.5                     | 200/100                                                       | 11        |
| S/CMK-3          | 69.3            | 0.3 mol L <sup>-1</sup> Mg(TFSI) <sub>2</sub> /glyme+diglyme                                                                  |      | 0.01 C                                    | 0.2                          | 500/1                                                         | 13        |
| S/ACC            | /               | 0.25 mol L <sup>-1</sup> MgTFSI <sub>2</sub> +MgCl <sub>2</sub> /DME                                                          |      | 200 mA g <sup>-1</sup> (0.12 C)           | 1.25~1.5                     | about 410/20                                                  | 14        |
|                  |                 | 1.0 mol L <sup>-1</sup> MgTFSI <sub>2</sub> +MgCl <sub>2</sub> /DME                                                           |      | 100 mA g <sup>-1</sup> (0.06 C)           | 1~1.25                       | about 600/110                                                 |           |
| S@MC             | 55.8            | 0.4 mol L <sup>-1</sup> (PhMgCl) <sub>2</sub> +AlCl <sub>3</sub> +1.0 mol L <sup>-1</sup> LiCl/THF                            |      | 0.04 C                                    | 1.1                          | 270/100                                                       | This work |
|                  |                 | 0.25 mol L <sup>-1</sup> BMA+2AlCl <sub>3</sub> +1.0 mol L <sup>-1</sup> LiCl /THF                                            |      | 0.04 C                                    | 1.1                          | 400/100                                                       |           |



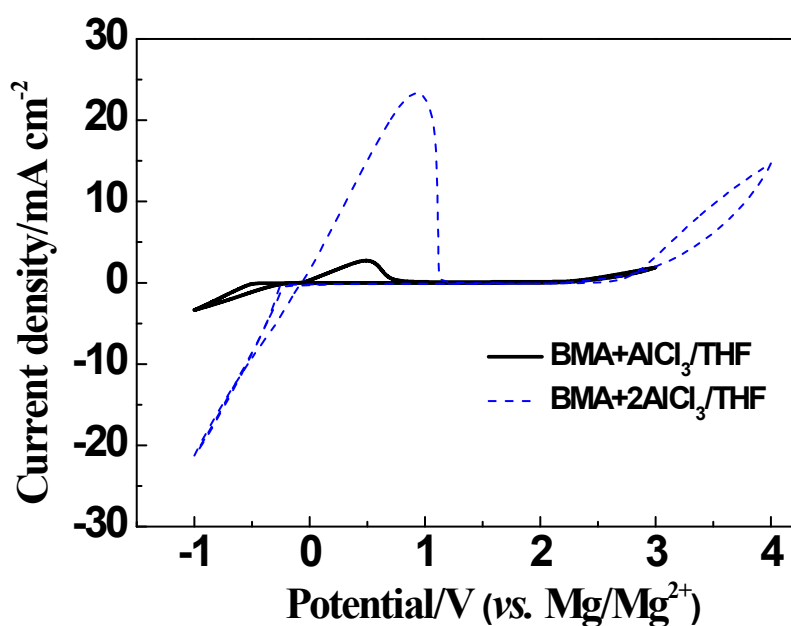

Figure S1. Comparison of CVs at 50 mV s<sup>-1</sup> for Mg electrochemical plating/stripping on SS disk electrode in 0.25 mol L<sup>-1</sup> MBA-AlCl<sub>3</sub>/THF electrolytes with 1:1 and 1:2 molar ratios of MBA to AlCl<sub>3</sub>.

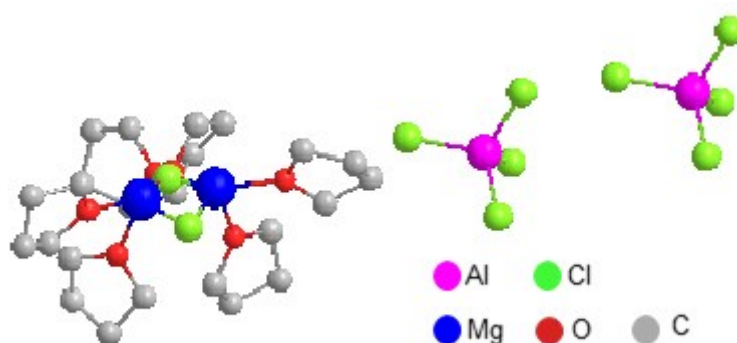

Figure S2. Molecular structures of  $[\text{Mg}_2(\mu\text{-Cl})_2(\text{THF})_6]^{2+}[\text{AlCl}_4]_2^-$ . Hydrogen atoms are omitted for clarity.

The asymmetric unit consists of an ionic pair. The cationic species has a typical structure of dimeric magnesium bridged by three chlorine atoms and each magnesium atom being solvated by three THF molecules. The counter anion is an aluminum atom tetrahedrally coordinated by four chlorine atom. Based on the data of single-crystal XRD, we suppose that the reaction between MBA and AlCl<sub>3</sub> at the 1:2 molar ratio is represented as equation (1):

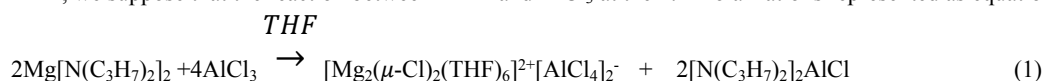

The aluminate anion can be stabilized by the electron donating effect of (C<sub>3</sub>H<sub>7</sub>)<sub>2</sub>N ligand, which is also beneficial to the electrochemical stability

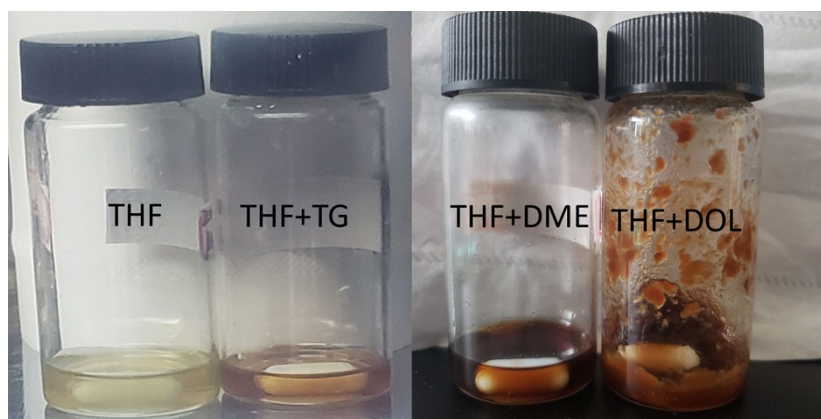

Figure S3. The photo of 0.25 mol L<sup>-1</sup> BMA+2AlCl<sub>3</sub> solutions with THF, THF+TG (1:1 volume ratio), THF+DME (1:1 volume ratio) and THF+DOL (1:1 volume ratio) solvents.

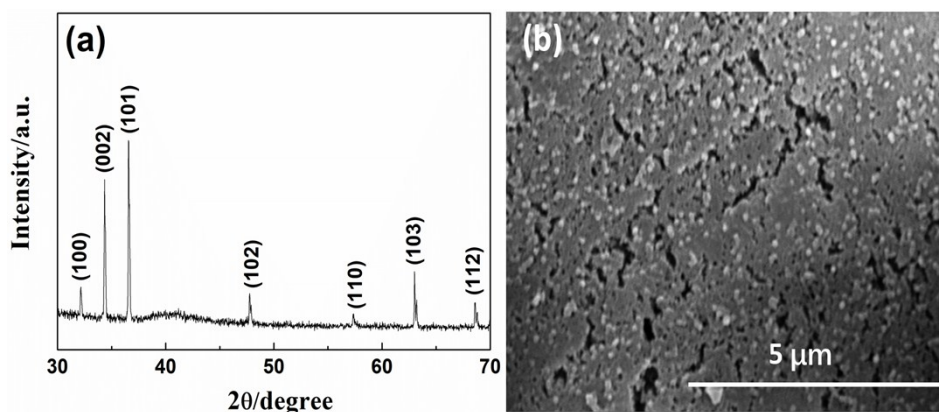

Figure S4. X-ray diffraction result (a) and SEM image (b) of electrodeposits from 0.25 mol L<sup>-1</sup> BMA+2AlCl<sub>3</sub>/THF solution. The deposits were obtained at 15.84 C cm<sup>-2</sup> charge.

As shown in Fig. S4a, the diffraction peaks observed at  $2\theta = 32.2^\circ, 34.4^\circ, 36.6^\circ, 47.8^\circ, 57.4^\circ, 63.1^\circ$  and  $68.6^\circ$  are in good accordance with the (100), (002), (101), (102), (110), (103) and (112) diffractions of metallic Mg (JCPDS file 35-0821), respectively. No other phases are identified, suggesting that deposition of pure metallic magnesium has been successfully obtained from the solution and confirming the crystalline metallic nature of these magnesium deposits. SEM image in Fig. S4b exhibits that the deposition layer obtained at 15.84 C cm<sup>-2</sup> charge (at a constant current density of 0.088 mA cm<sup>-2</sup> for 50 hours) is compact and uniform, which is very important for practical uses. The magnesium deposits appear in an agglomerated particles with an average size of from ca. 100 to 300 nm, evenly spread over the surface.

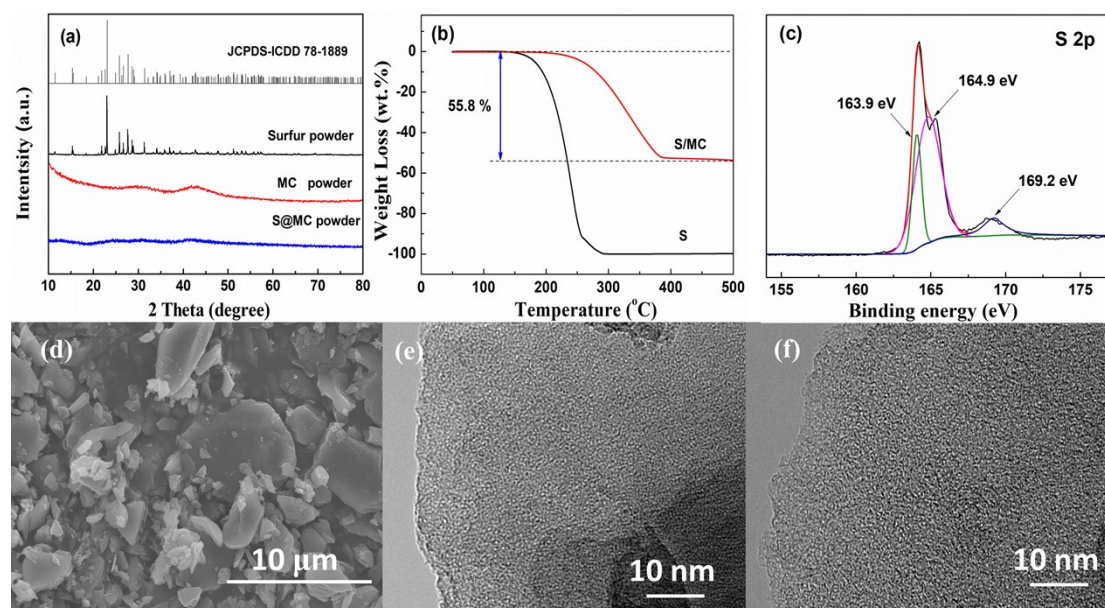

Figure S5. XRD results of S powder, MC powder, S@MC composite powder (a). TGA curves of S and S@MC composite (b). The high resolution S 2p XPS spectra of S@MC powder (c). SEM images of MC (d) and S@MC composite (e). TEM image of S@MC composite (f).

X-ray diffraction (XRD) patterns in Fig. S5a show that the sharp diffraction peaks of bulk crystalline sulfur disappear entirely after encapsulating sulfur into the micropores of carbon, demonstrating that sulfur exists as a highly dispersed state inside the micropores of carbon. All sulfur content in the S@MC composite is calculated to be 55.8 wt% according to the weight loss (Fig. S5b). The peaks at 163.9 and 164.9 eV in X-ray photoelectron spectroscopy (XPS) result (Fig. S5c) can be attributed to  $S_{2p_{3/2}}$  and  $S_{2p_{1/2}}$  of the sulfur species containing S-S bond, probably arising from short-chain  $S_x$  ( $x < 8$ ).<sup>1</sup> Furthermore, the additional peak at a higher binding energy of 169.2 eV arises from sulfur atoms located at the chain end of small  $S_{2-4}$  molecules.<sup>2</sup> Scanning electron microscopy (SEM) image demonstrates that S@MC composite is composed of bitty patches with sizes about 1-10  $\mu\text{m}$  (Fig. S5d). The filling of the microporous carbon with sulfur is corroborated by the undistinguishable difference of transmission electron microscopy (TEM) images for MC and S@MC (Fig. S5e and Fig. S5f), confirming the highly dispersed sulfur inside the narrow micropores.

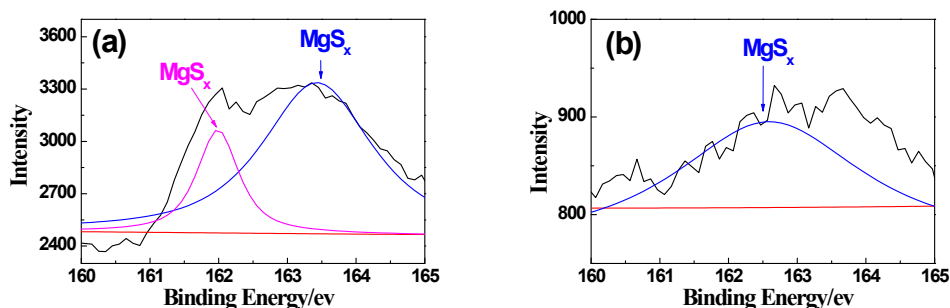

Figure S6. Comparison of surface XPS measurements of S@MC cathodes cycled in 0.25 mol L<sup>-1</sup> BMA+2AlCl<sub>3</sub>/THF electrolyte in the absence (a) and presence (b) of LiCl.

The XPS result for the cathode from the electrolyte without LiCl shows that S 2p<sub>3/2</sub> peaks appear at 163.5 and 162.0 eV, which are assigned to the Mg-S bonds in magnesium polysulfides (MgS<sub>x</sub>, 1 < x < 8),<sup>3</sup> as shown in Fig. S6a. When LiCl is added (Fig. S6b), slightly reduced peak (163.5 eV) shifts to a lower value (162.5 eV) and highly reduced peak (162.0 eV) disappears, indicating that the decrease of magnesium polysulfides in electrolyte with LiCl additive.

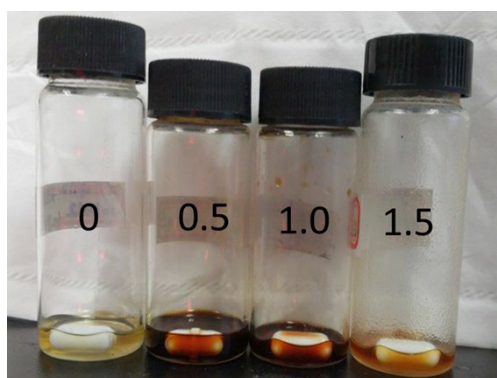

Figure S7. The photo of 0.25 mol L<sup>-1</sup> BMA+2AlCl<sub>3</sub>/THF solutions containing LiCl at different concentrations.

## References

1. C. Luo, Y. J. Zhu, O. Borodin, T. Gao, X. L. Fan, Y. H. Xu, K. Xu, C. S. Wang, *Adv. Funct. Mater.* 2016, 26, 745–752.
2. Z. Li, L. X. Yuan, Z. Q. Yi, Y. M. Sun, Y. Liu, Y. Jiang, Y. Shen, Y. Xin, Z. L. Zhang, Y. H. Huang, *Adv. Energy Mater.*, 2014, 4, 1301473.
3. H. S. Kim, T. S. Arthur, G. D. Allred, J. Zajicek, J. G. Newman, A. E. Rodnyansky, A. G. Oliver, W. C. Boggess and J. Muldoon, *Nature Commun.*, 2011, 2, 427.
